# Supplementary material for: Surfactant assisted exfoliation of near infrared fluorescent silicate nanosheets
Source: Royal Society of Chemistry journal article supplement (doi:10.1039/d3ra04083f), 2023-01-01
Supplement: d3ra04083f1.pdf [file d3ra04083f1.pdf]

## Supplementary Information

### Surfactant Assisted Exfoliation of Near Infrared Fluorescent Silicate Nanosheets

Björn Hill,<sup>a</sup> Smitha Abraham,<sup>a</sup> Anas Akhtar,<sup>b</sup> Gabriele Selvaggio,<sup>a</sup> Kristina Tschulik<sup>b</sup> and Sebastian Kruss<sup>\*acd</sup>

*a. Department of Chemistry, Ruhr Universität Bochum, 44801 Bochum, Germany E-mail: Sebastian.Kruss@rub.de*

*b. Analytical Chemistry II, Ruhr Universität Bochum, 44801 Bochum, Germany*

*c. Fraunhofer Institute for Microelectronic Circuits and Systems, 47057 Duisburg, Germany*

*d. Center for Nanointegration Duisburg-Essen (CENIDE), 47057 Duisburg, Germany*

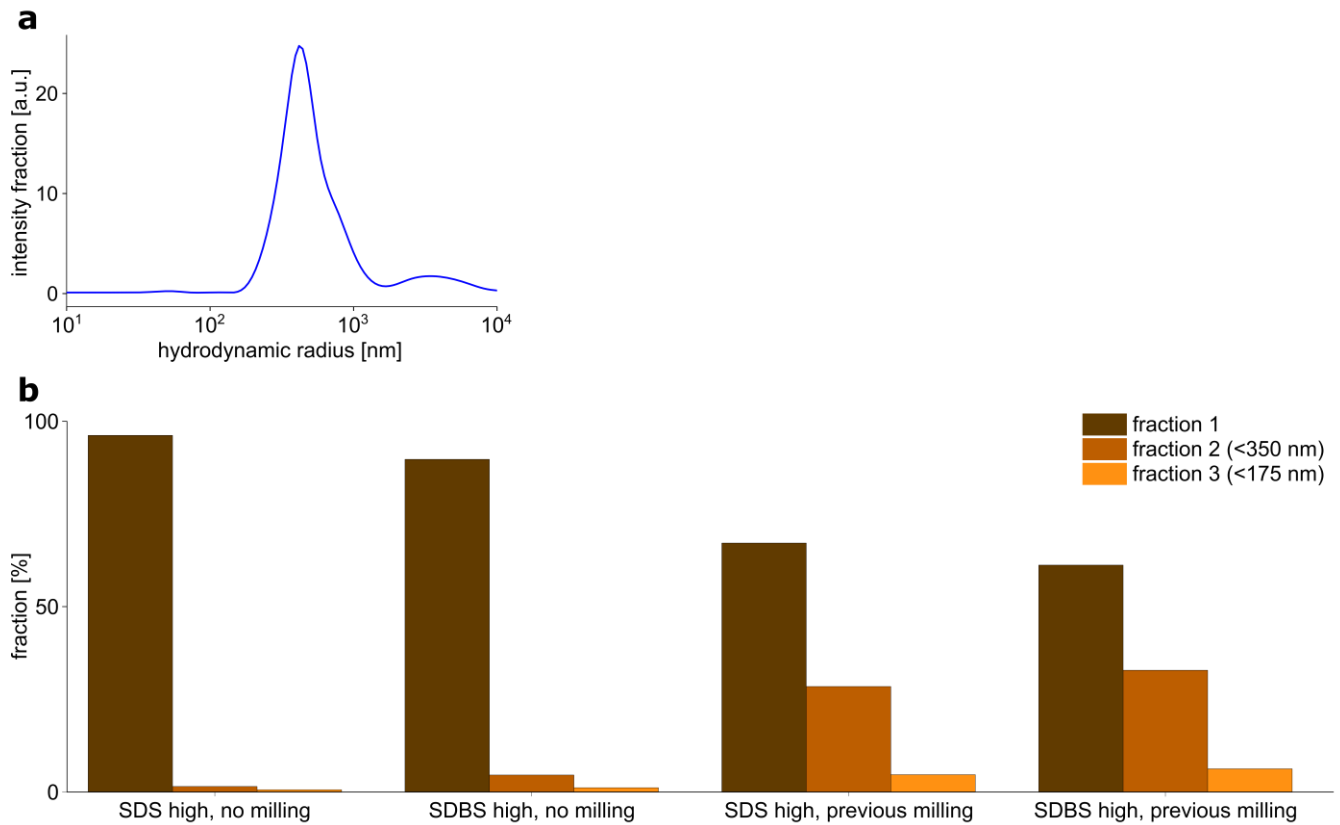

**Figure S1: Liquid phase exfoliation of EB-NS** a) Size distribution of EB-NS after planetary ball milling and size-selective centrifugation, measured by DLS. b) Size distribution of EB-NS exfoliated with and without previous planetary ball-milling exfoliated by bath sonication in different surfactants. After sonication, the samples were divided by liquid cascade centrifugation. Larger particles are enriched in fraction 1, fraction 2 contains only particles  $r_{\text{hyd}} < 350$  nm, fraction 3 contains only particles  $r_{\text{hyd}} < 175$  nm. The samples were dispersed at constant volume and their fluorescence intensity was measured.

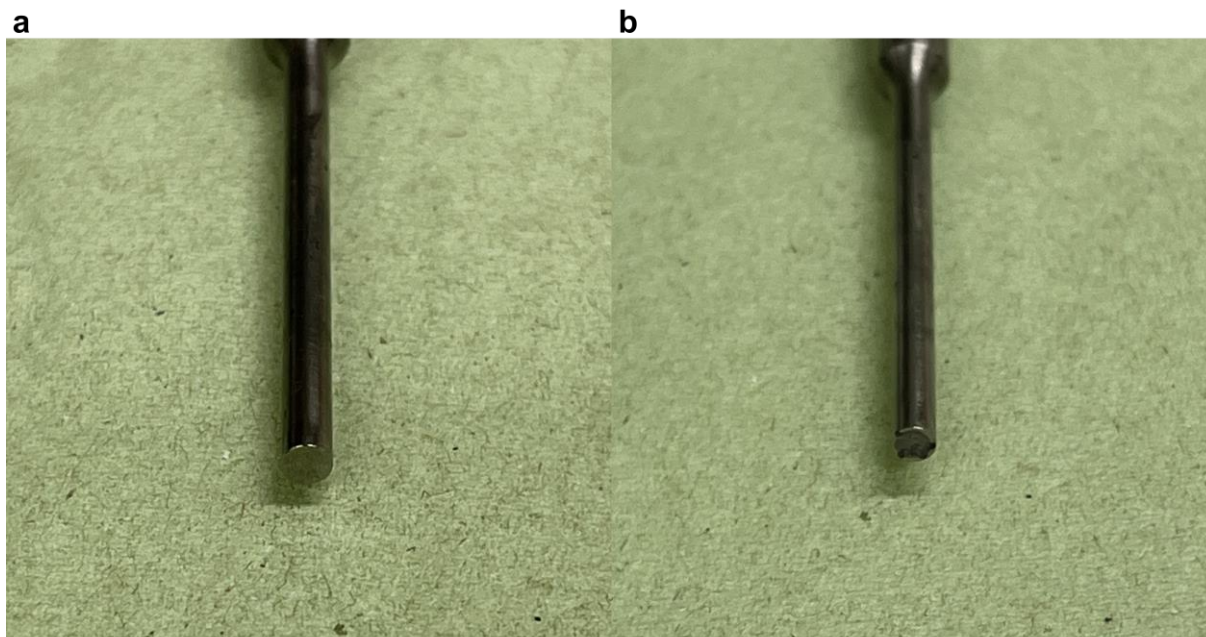

**Figure S2: Tip erosion upon tip sonication of EB** a) Photograph of a sonication tip for a sonic dismembrator. The tip is freshly ground and has a flat, smooth surface. b) Photograph of the same sonication tip for a sonic dismembrator after sonicating EB dispersion. 50 ml EB-NS dispersion diluted with deionized water to  $0.6 \text{ mg ml}^{-1}$  were sonicated in an ice bath for 6 h at 72 W amplitude. The tip shows abrasions, it has small cavities in the surface. The weight of the tip has decreased by 4 mg after sonication.

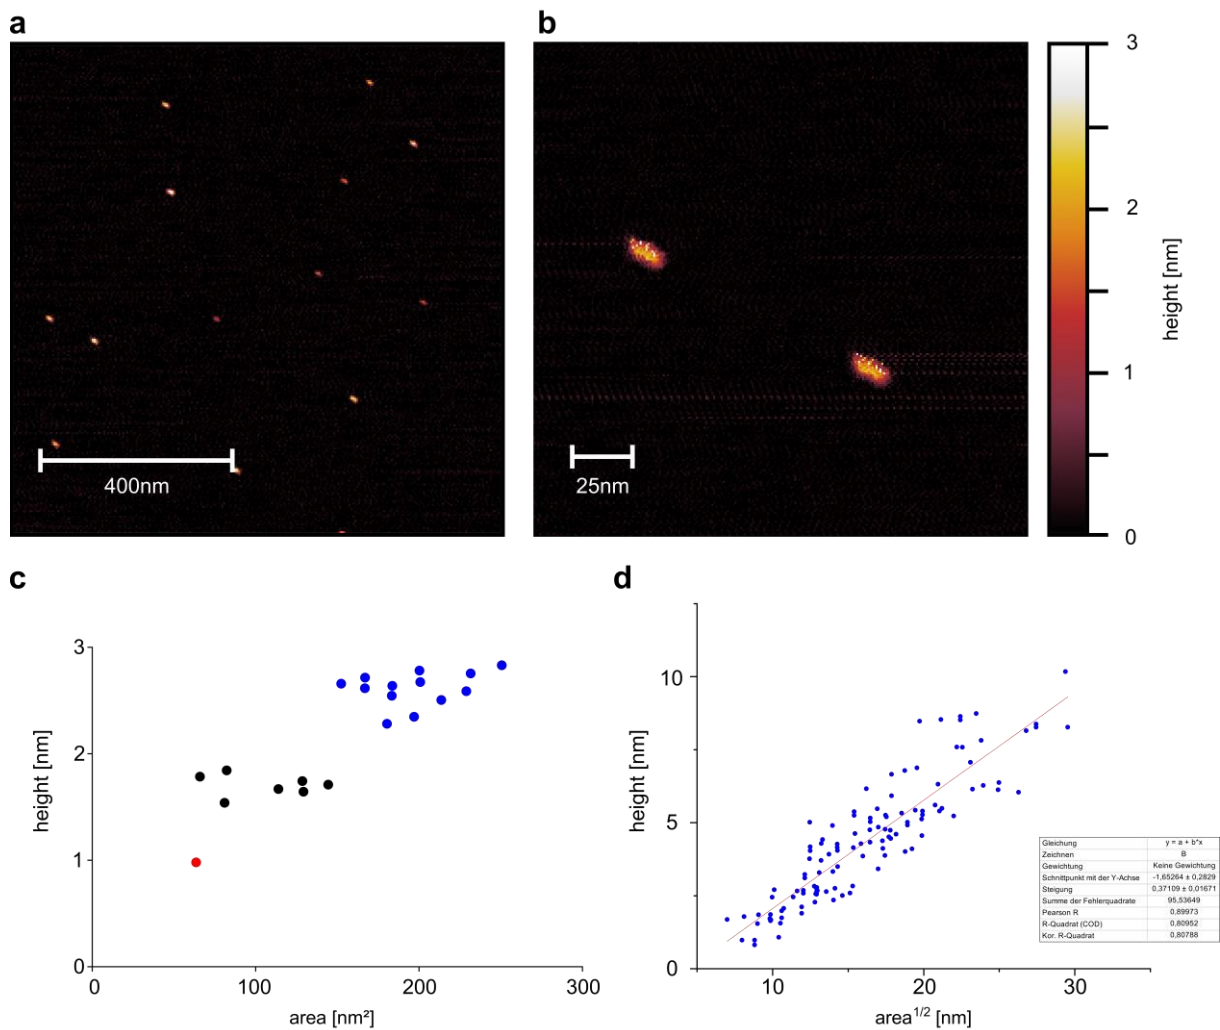

**Figure S3: Height and morphology of exfoliated EB-NS** a) Zoom in Figure 2a) shows the EB-NS in more detail. EB-NS are shaped slightly elongated. b) Detailed image of two EB-NS. c) Surface area and maximum height distribution of  $n=21$  analyzed EB-NS from a) and Figure 2a). The different colors show particles expected to consist of 1, 2 and 3 monolayers. c) Zoom in image a) shows the EB-NS in more detail. EB-NS are shaped slightly elongated. d) Surface area and maximum height distribution of  $n=118$  analyzed EB-NS from Figure 2b). On the x-axis, the root of the base area is given. Red line: linear fit.
